# Supplementary material for: Electron-beam-promoted fullerene dimerization in nanotubes: insights from DFT computations
Source: publisher site journal article supplement (doi:10.3762/bjoc.20.10), 2024-01-17
Supplement: Additional file 1 [file 1860-5397-20-10-S1.pdf]

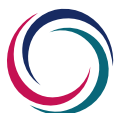

## Supporting Information

for

### **Electron-beam-promoted fullerene dimerization in nanotubes: insights from DFT computations**

Laura Abella, Gerard Novell-Leruth, Josep M. Ricart, Josep M. Poblet  
and Antonio Rodríguez-Forteza

*Beilstein J. Org. Chem.* **2024**, *20*, 92–100. [doi:10.3762/bjoc.20.10](https://doi.org/10.3762/bjoc.20.10)

**Additional details of the computational settings and results:  
encapsulation energies, molecular orbitals (MO), MO  
diagrams, intermediate structures in metadynamics and  
optimized xyz coordinates for the dimers**

## FULLERENE@CARBON NANOTUBE (X@SWCNT)

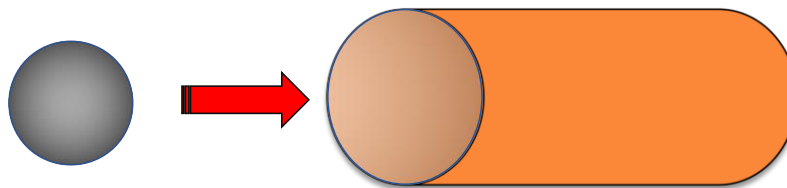

**Encapsulation energy of fullerenes inside CNT**

$$E_{\text{int}} = E_{\text{Cxx@CNT}} - E_{\text{CNT}} - E_{\text{Cxx}}$$

| (X@SWCNT)                          | eV    |
|------------------------------------|-------|
| C <sub>60</sub>                    | -3.23 |
| C <sub>60</sub> ···C <sub>60</sub> | -6.48 |
| Dimer 1-D <sub>2h</sub>            | -6.45 |
| Dimer 1-C <sub>s</sub>             | -6.50 |

**Figure S1:** Encapsulation energies (in eV) of C<sub>60</sub> and C<sub>60</sub> dimers inside the carbon nanotube (CNT).

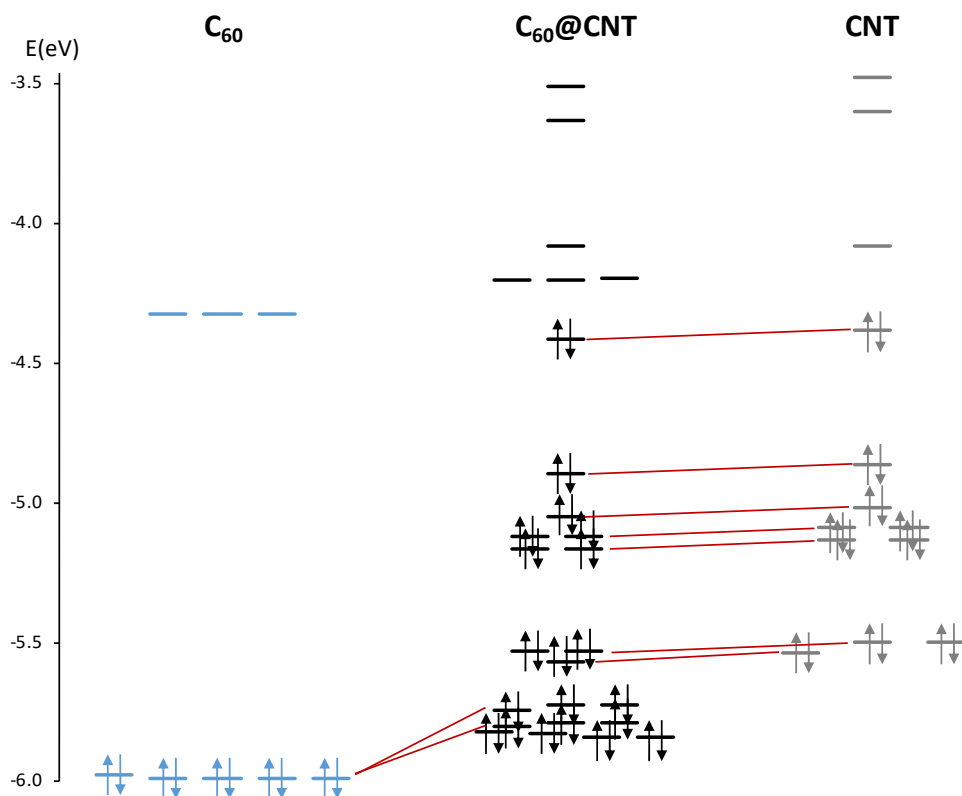

**Figure S2:** Molecular orbital diagram of the C<sub>60</sub>@CNT peapod as a combination of molecular fragments of one C<sub>60</sub> fullerene and the carbon nanotube (CNT) using the ADF/PBE/TZP/D3-BJDAMP level of theory.

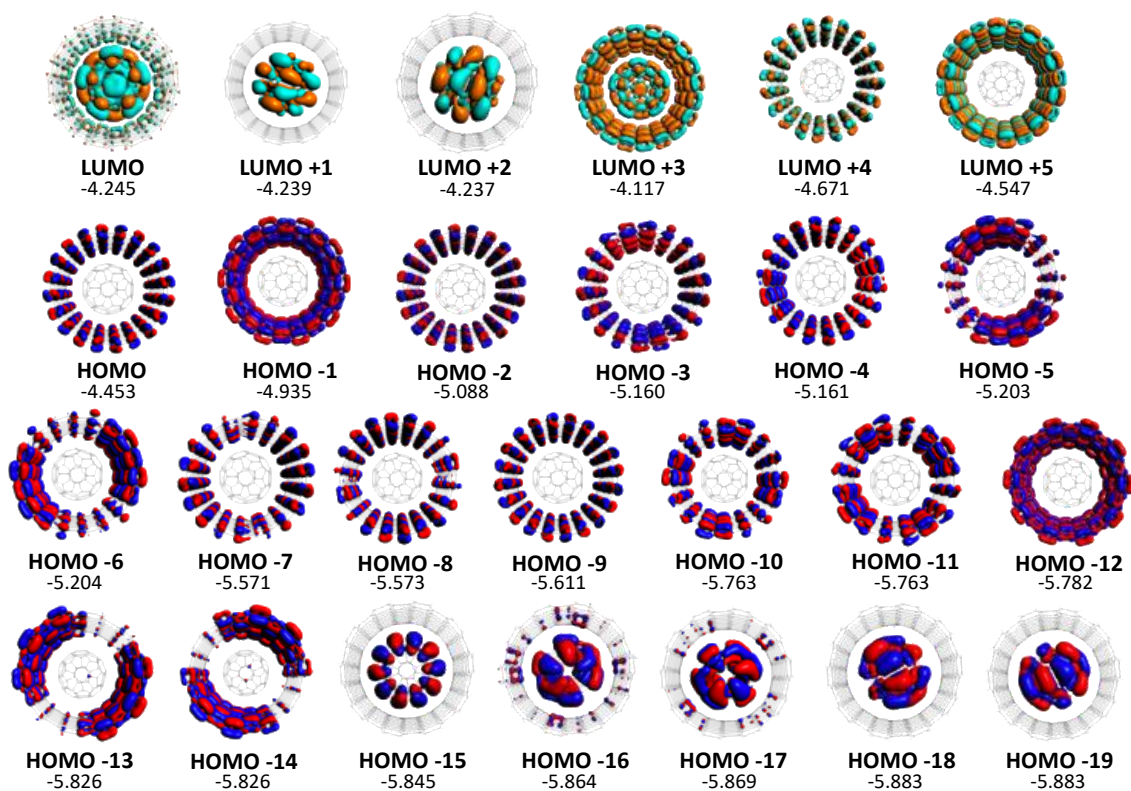

**Figure S3:** Isosurfaces ( $\pm 0.01$ ) of the  $C_{60}@CNT$  peapod with the corresponding molecular orbital energy in eV using the ADF/PBE/TZP/D3-BJDAMP level of theory.

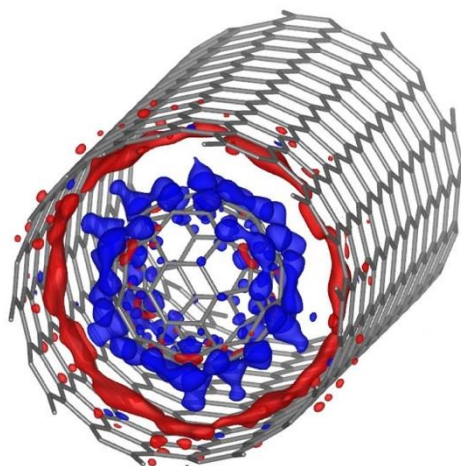

**Figure S4:** Difference charge density of the  $C_{60}@CNT$  peapod defined as  $\Delta\rho = \rho_{C_{60}@CNT} - \rho_{CNT} - \rho_{C_{60}}$ . There is a small electron transfer of 0.02 e from the CNT to the fullerene.

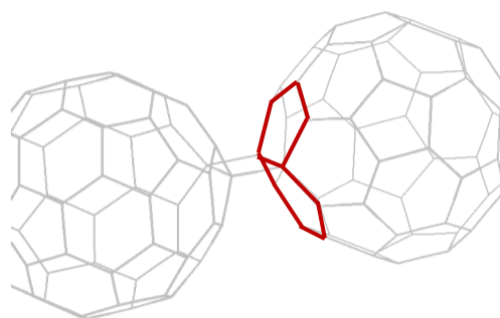

**Figure S5:** The highlighted carbon atoms are those used to define the coordination number used as collective variable in the metadynamics simulation starting from dimer  $1-C_s^+$ . The coordination number considered is that of the nine highlighted C atoms of a  $C_{60}$  molecule with respect to the nine equivalent C atoms of the second  $C_{60}$  molecule.

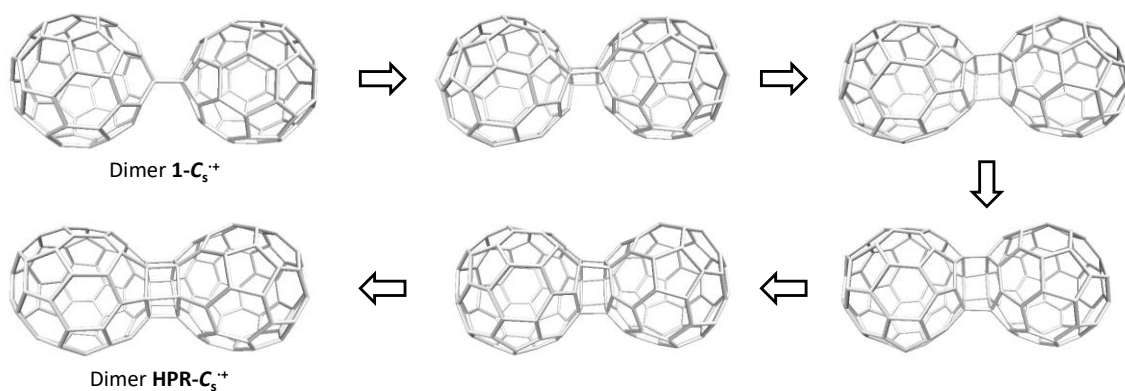

**Figure S6:** Structures observed in the metadynamics run at 793 K (4 ps) starting from dimer  $1-C_s^+$ . The number of C–C bonds increases from two in dimer  $1-C_s^+$  to six in dimer  $HPR-C_s^+$ .

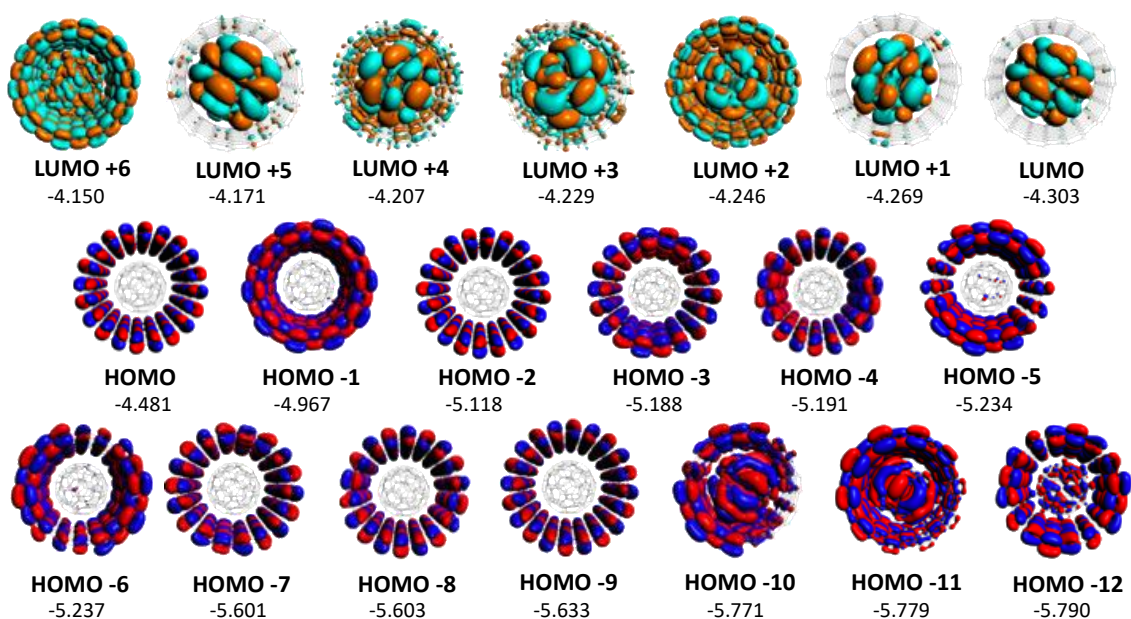

**Figure S7:** Isosurfaces ( $\pm 0.005$ ) of selected molecular orbitals (MOs) for the DFT-optimized structure of  $(C_{60})_2@CNT$ . Energies (in eV) for each orbital are indicated.

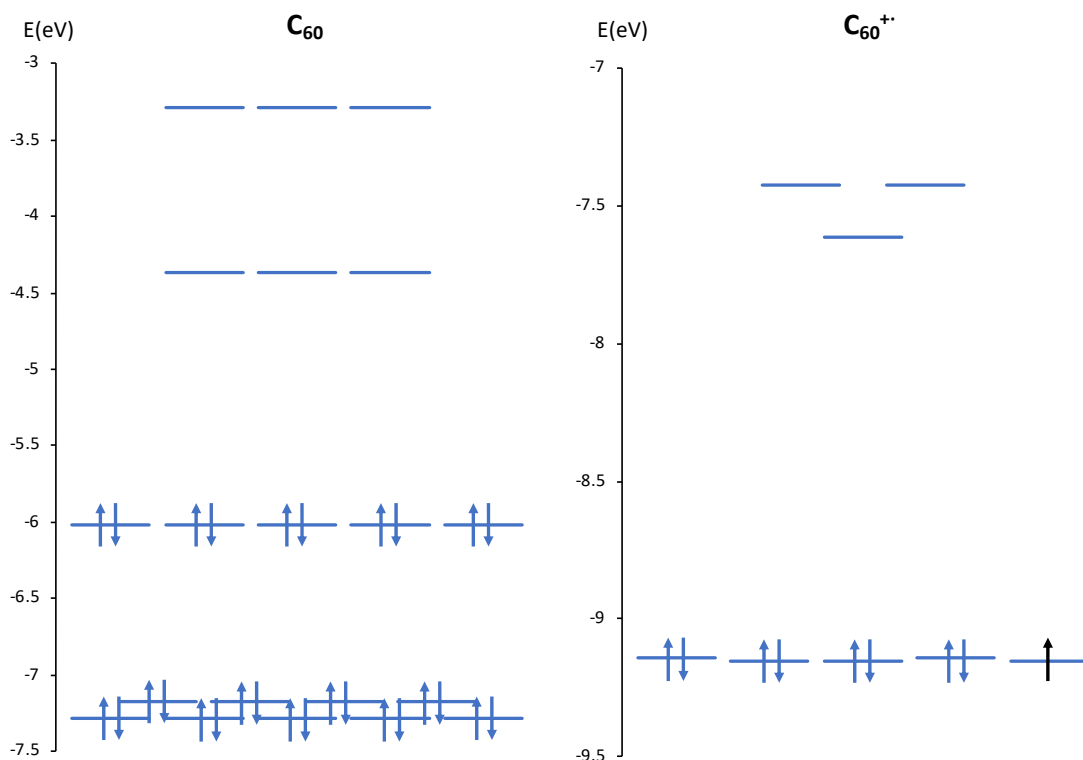

**Figure S8:** Representation of the molecular diagrams for  $C_{60}$  and  $C_{60}^{+}$  fullerenes. Energies for each orbital in eV.

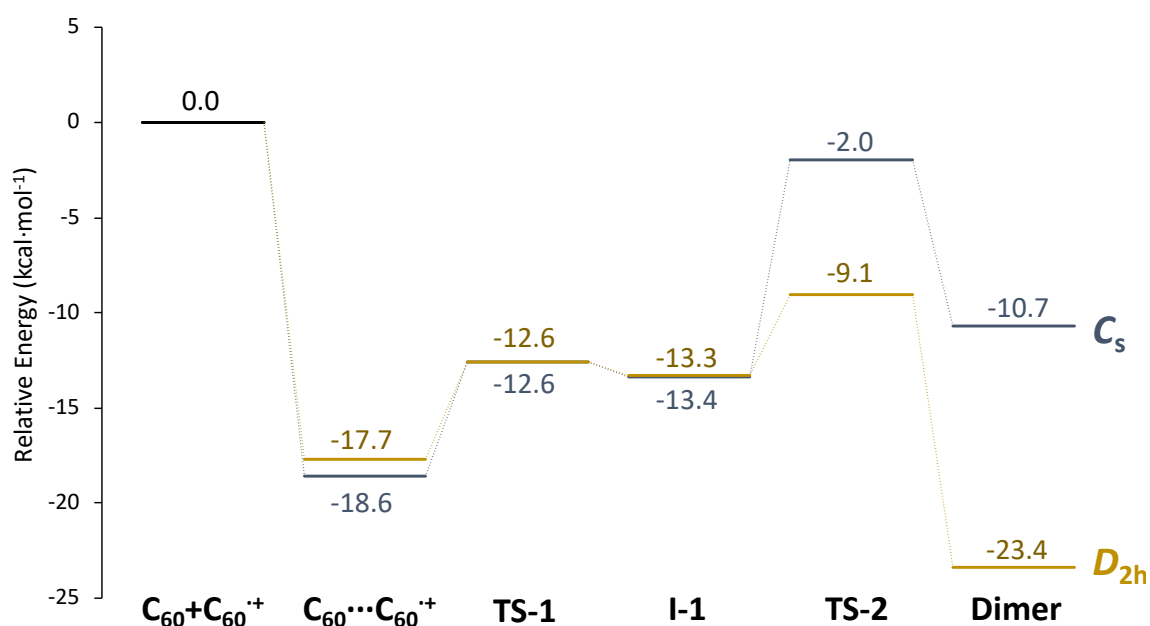

**Figure S9:** Energy profiles for the dimerization of  $C_{60} + C_{60}^{+}$  in the gas phase, comparison of the two isomers dimer **1-C<sub>s</sub><sup>+</sup>** and dimer **1-D<sub>2h</sub><sup>+</sup>** (using ADF code, PBE/TZP). All energy values are in kcal·mol<sup>-1</sup> relative to reactants. In gas phase, dimer **1-D<sub>2h</sub><sup>+</sup>** is the thermodynamic and the kinetic product. From the energy profile inside the CNT (Figure 3), we expect that the TS for radical **1-D<sub>2h</sub>** would have rather similar energy as for radical **1-C<sub>s</sub>** and this last step is expected to be reversible at moderate and high temperatures, so the two isomers are expected to be formed inside the CNT according to the proposed mechanism.

**Table S1:** Gas phase relative energies and Gibbs free energies for radical cation dimers  $1-C_s^{+\cdot}$  and  $1-D_{2h}^{+\cdot}$ .<sup>a</sup>

|                     | Energy | Free energy<br>298 K | Free energy<br>400 K | Free energy<br>800 K |
|---------------------|--------|----------------------|----------------------|----------------------|
| $1-D_{2h}^{+\cdot}$ | 0.0    | 0.0                  | 0.0                  | 0.0                  |
| $1-C_s^{+\cdot}$    | 13.2   | 12.3                 | 12.0                 | 11.0                 |

<sup>a</sup> Relative energies and free energies in kcal·mol<sup>-1</sup>. Free energies estimated within the harmonic and rigid rotor approximation.

**Table S2.** Relative energies and C–C distances for several dimers during the reaction of one neutral C<sub>60</sub> and one radical cation C<sub>60</sub><sup>+\cdot</sup>.<sup>a</sup>

|                             | Rel. energy | C–C dist<br>New bonds | C–C dist<br>Hexagons |
|-----------------------------|-------------|-----------------------|----------------------|
| Dimer $1-C_s^{+\cdot}$      | 0.0         | 1.587                 | 1.60-1.60            |
| Dimer $3B-C_s^{+\cdot}$     | 18.7        | 1.53-1.66             | 1.56-1.58            |
| Dimer $4B-C_s^{+\cdot}$     | 34.3        | 1.56-1.71             | 1.55-1.57            |
| Dimer $HPR-C_s^{+\cdot}$    | 49.2        | 1.597                 | 1.55-1.57            |
| Dimer $1-D_{2h}^{+\cdot}$   | 0.0         | 1.588                 | 1.596                |
| Dimer $3B-D_{2h}^{+\cdot}$  | 32.7        | 1.53-1.65             | 1.57-1.58            |
| Dimer $4B-D_{2h}^{+\cdot}$  | 39.3        | 1.57-1.69             | 1.56-1.56            |
| Dimer $HPR-D_{2h}^{+\cdot}$ | 63.3        | 1.60-1.60             | 1.56-1.57            |

<sup>a</sup> Relative energies with respect to dimer  $1-C_s^{+\cdot}$  and dimer  $1-D_{2h}^{+\cdot}$  (in kcal·mol<sup>-1</sup>); C–C distances (in Å) for the formed bonds in the dimer (new bonds) and within those hexagonal faces of each C<sub>60</sub> that are interacting (hexagons).

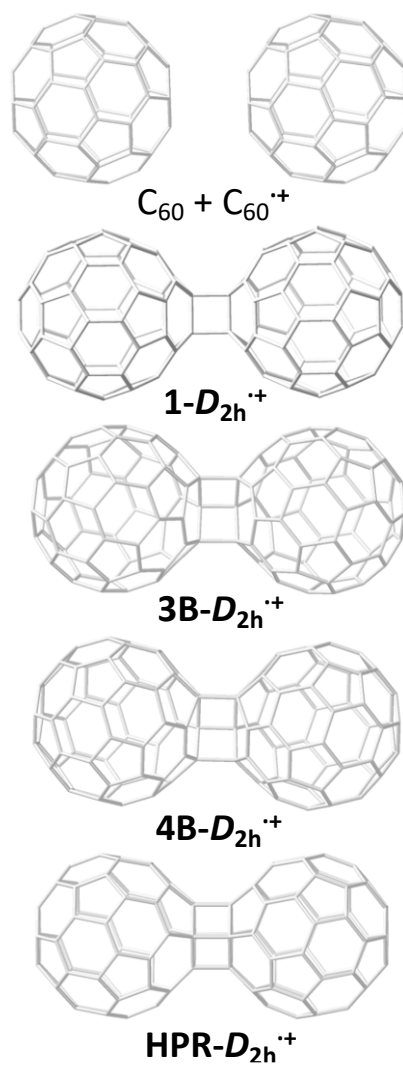

**Figure S10:** Proposed sequence of C<sub>60</sub> dimers up to the formation of dimer **HPR-D<sub>2h</sub><sup>+</sup>**.



## xyz coordinates

### Dimer 1- $D_{2h}^+$

C -3.710162 3.867641 -11.265162  
C -5.139645 3.877435 -11.002691  
C -5.463631 2.689086 -10.239747  
C -4.230741 1.940264 -10.028518  
C -3.150783 2.669495 -10.662266  
C -2.988035 5.062238 -11.245300  
C -3.665110 6.316830 -10.962304  
C -5.041098 6.327666 -10.705013  
C -5.792561 5.084407 -10.725570  
C -6.793125 5.145799 -9.676803  
C -7.109611 3.998792 -8.944398  
C -6.431286 2.745509 -9.232509  
C -6.198073 2.067059 -7.971783  
C -5.011013 1.345468 -7.768446  
C -4.012103 1.275797 -8.818326  
C -2.701770 1.321426 -8.189539  
C -1.662345 2.029501 -8.798113  
C -1.889381 2.713724 -10.057187  
C -1.137551 3.956978 -10.036547  
C -1.675970 5.108847 -10.621846  
C -1.542097 6.387961 -9.954608  
C -2.775116 7.136859 -10.165762  
C -3.290114 7.942386 -9.145841  
C -4.719187 7.954474 -8.878506  
C -5.576316 7.159398 -9.643460  
C -6.655686 6.426344 -9.001635  
C -6.825935 6.506303 -7.617974  
C -7.150280 5.315441 -6.853737  
C -7.296192 4.086272 -7.507417  
C -6.736937 2.894363 -6.911234  
C -6.060680 2.988415 -5.686371  
C -4.829916 2.240900 -5.475680  
C -4.320192 1.426289 -6.497317  
C -2.897702 1.415267 -6.754156  
C -2.052447 2.219595 -5.980647  
C -0.970180 2.949877 -6.615044  
C -0.774058 2.854079 -7.994485  
C -0.444653 4.042874 -8.764643  
C -0.309635 5.277198 -8.123628  
C -0.870300 6.473078 -8.731818  
C -1.412431 7.298930 -7.669507  
C -2.599493 8.020586 -7.872677  
C -3.597920 8.087884 -6.824497  
C -4.904384 8.044103 -7.441363  
C -5.934197 7.328021 -6.819984  
C -5.698899 6.651901 -5.559276  
C -6.461799 5.390337 -5.580044  
C -5.953841 4.240689 -4.995396  
C -4.709915 4.237838 -4.119669  
C -3.957265 3.029145 -4.655074  
C -2.596178 3.043704 -4.918762  
C -1.833464 4.304937 -4.897628  
C -0.835634 4.231786 -5.946978  
C -0.504899 5.372357 -6.688160  
C -1.180712 6.619734 -6.410688  
C -2.153845 6.667962 -5.401727  
C -3.384759 7.415498 -5.612398  
C -4.453706 6.721554 -4.954680  
C -3.886567 5.600127 -4.097500  
C -2.457898 5.509341 -4.613273  
C -4.915864 4.336241 -2.552864  
C -6.342842 4.425453 -2.032688  
C -6.643886 3.266488 -1.243889  
C -5.411802 2.519582 -1.037354  
C -4.345128 3.214909 -1.697402  
C -4.093129 5.699014 -2.531300  
C -4.845226 6.907948 -1.994992  
C -6.204778 6.891875 -1.726901  
C -6.966327 5.629556 -1.745799  
C -7.961313 5.701172 -0.693848  
C -8.289412 4.559936 0.047564  
C -7.613898 3.313193 -0.232069  
C -7.378551 2.633123 1.025354  
C -6.190380 1.912267 1.225073  
C -5.194867 1.846424 0.174136  
C -3.886728 1.891244 0.787574  
C -2.858962 2.608419 0.163898  
C -3.098126 3.285048 -1.096048  
C -2.336415 4.547243 -1.076231  
C -2.847764 5.696979 -1.658210  
C -2.739069 6.949028 -0.968311  
C -3.970739 7.696184 -1.176097  
C -4.478024 8.509221 -0.152141  
C -5.899661 8.519201 0.108478  
C -6.746069 7.714437 -0.662903  
C -7.826136 6.982767 -0.025968  
C -8.018515 7.077453 1.353954  
C -8.344678 5.888405 2.124643  
C -8.480413 4.654302 1.483540  
C -7.917566 3.458386 2.089579  
C -7.242475 3.543525 3.310565  
C -6.008387 2.795449 3.517923

C -5.496255 1.990081 2.496641  
C -4.067766 1.979479 2.225348  
C -3.209092 2.775443 2.987888  
C -2.131461 3.509534 2.343733  
C -1.965073 3.430365 0.959530  
C -1.643670 4.621721 0.195071  
C -1.496402 5.850859 0.848734  
C -2.058861 7.042644 0.254755  
C -2.595116 7.869032 1.317046  
C -3.783844 8.588894 1.117202  
C -4.779790 8.656897 2.169678  
C -6.091723 8.611453 1.544650  
C -7.129006 7.902575 2.155767  
C -6.897420 7.217818 3.413561  
C -7.648075 5.974305 3.394447  
C -7.107098 4.822549 3.977830  
C -5.793593 4.869676 4.598359  
C -5.116570 3.615789 4.312743  
C -3.741508 3.606319 4.051476  
C -2.990774 4.850232 4.070768  
C -1.993098 4.789869 3.018948  
C -1.678409 5.937487 2.286467  
C -2.357684 7.190099 2.577115  
C -3.322542 7.245277 3.586893  
C -4.556937 7.993223 3.379502  
C -5.634385 7.262734 4.015714  
C -5.072288 6.064887 4.617212  
C -3.643516 6.056359 4.350773

### Dimer 1- $C_s^+$

C -3.945370 4.224548 -10.712773  
C -5.349321 4.098833 -10.364037  
C -5.519779 2.859257 -9.625307  
C -4.200968 2.220332 -9.503179  
C -3.243553 3.067266 -10.178582  
C -3.325686 5.476686 -10.706154  
C -4.087382 6.659553 -10.335842  
C -5.435646 6.540939 -9.992796  
C -6.084701 5.238174 -10.013284  
C -7.010561 5.178298 -8.896505  
C -7.163456 3.983076 -8.183081  
C -6.400532 2.804214 -8.551791  
C -6.046788 2.082900 -7.337487  
C -4.850529 1.195894 -7.256987  
C -3.849161 1.535946 -8.350387  
C -2.535590 1.714776 -7.793719  
C -1.579258 2.512365 -8.463753  
C -1.942188 3.201879 -9.680459  
C -1.299540 4.503603 -9.673852  
C -1.979427 5.620335 -10.170924  
C -1.913306 6.885776 -9.463827  
C -3.210077 7.527905 -9.562365  
C -3.720249 8.243691 -8.473392  
C -5.124751 8.116770 -8.115074  
C -5.966014 7.286050 -8.859634  
C -6.935446 6.439041 -8.183898  
C -7.016774 6.452652 -6.784304  
C -7.164588 5.208310 -6.057791  
C -7.234462 4.000149 -6.739200  
C -6.514376 2.813458 -6.242966  
C -5.748723 2.918172 -5.025456  
C -4.507208 2.292679 -4.886772  
C -3.987161 1.312821 -5.884692  
C -2.596450 1.707885 -6.357407  
C -1.770319 2.554910 -6.635420  
C -0.812458 3.401991 -6.309992  
C -0.700852 3.372632 -7.705095  
C -0.526703 4.610004 -8.444015  
C -0.464746 5.828814 -7.760544  
C -1.167824 6.988341 -8.277519  
C -1.696084 7.736274 -7.152764  
C -2.950370 8.349604 -7.248338  
C -3.875224 8.288864 -6.126822  
C -5.219671 8.141345 -6.663646  
C -6.145869 7.323602 -6.010840  
C -5.765320 6.624551 -4.793368  
C -6.384735 5.315332 -4.817476  
C -5.710654 4.209346 -4.315783  
C -4.384593 4.365247 -3.762019  
C -3.629451 3.185075 -4.142014  
C -2.286847 3.304293 -4.480390  
C -1.646100 4.608458 -4.471168  
C -0.730187 4.667100 -5.596321  
C -0.561886 5.857451 -6.308178  
C -1.318618 7.041166 -5.929737  
C -2.206054 6.985897 -4.853207  
C -3.510977 7.623964 -4.953174  
C -4.474450 6.777484 -4.268149  
C -3.770807 5.623804 -3.741460  
C -2.370242 5.749340 -4.102694  
C -4.154406 -3.948648 -9.057972  
C -5.452988 -3.321511 -9.149039  
C -6.469110 -4.345214 -8.956380

|   |           |           |           |
|---|-----------|-----------|-----------|
| C | -5.787813 | -5.611580 | -8.746619 |
| C | -4.354918 | -5.365022 | -8.810330 |
| C | -3.102835 | -3.267101 | -8.427772 |
| C | -3.306313 | -1.937723 | -7.890066 |
| C | -4.542604 | -1.329731 | -8.000398 |
| C | -5.635751 | -2.043314 | -8.603845 |
| C | -6.845747 | -1.735609 | -7.860465 |
| C | -7.830787 | -2.717827 | -7.689345 |
| C | -7.633109 | -4.049513 | -8.241983 |
| C | -8.164926 | -5.008275 | -7.288190 |
| C | -7.510242 | -6.227732 | -7.084600 |
| C | -6.297937 | -6.535186 | -7.828031 |
| C | -5.397092 | -7.250612 | -6.940418 |
| C | -4.019183 | -7.014816 | -7.004003 |
| C | -3.490081 | -6.054146 | -7.952426 |
| C | -2.388569 | -5.352224 | -7.310833 |
| C | -2.205998 | -3.985987 | -7.539387 |
| C | -1.845650 | -3.102729 | -6.443555 |
| C | -2.515429 | -1.834271 | -6.641683 |
| C | -2.991616 | -1.126151 | -5.553968 |
| C | -4.220839 | -0.237649 | -5.622165 |
| C | -5.073963 | -0.350517 | -6.969741 |
| C | -6.503879 | -0.830951 | -6.794672 |
| C | -7.106150 | -0.973571 | -5.559346 |
| C | -8.111331 | -1.996646 | -5.356277 |
| C | -8.479384 | -2.851486 | -6.405387 |
| C | -6.689012 | -4.265470 | -6.151764 |
| C | -8.537827 | -4.773902 | -4.856681 |
| C | -7.863206 | -6.040070 | -4.646868 |
| C | -7.356680 | -6.753638 | -5.738973 |
| C | -6.051629 | -7.387301 | -5.649614 |
| C | -5.304478 | -7.290162 | -4.471011 |
| C | -3.871843 | -7.051900 | -4.534905 |
| C | -3.241012 | -6.913316 | -5.776346 |
| C | -2.231617 | -5.889953 | -5.967461 |
| C | -1.882260 | -5.042293 | -4.910138 |
| C | -1.678854 | -3.625452 | -5.152721 |
| C | -2.200914 | -2.897248 | -4.019245 |
| C | -2.864408 | -1.681258 | -4.232998 |
| C | -4.075718 | -1.373947 | -3.491486 |
| C | -4.955997 | -0.628977 | -4.352424 |
| C | -6.315660 | -0.870352 | -4.311841 |
| C | -6.853666 | -1.832678 | -3.372495 |
| C | -7.957498 | -2.527212 | -4.012371 |
| C | -8.172513 | -3.885501 | -3.763851 |
| C | -7.279902 | -4.609796 | -2.871940 |
| C | -7.084950 | -5.938777 | -3.419203 |
| C | -5.831597 | -6.555130 | -3.333018 |
| C | -4.725507 | -5.864520 | -2.692579 |
| C | -3.513111 | -6.171752 | -3.435959 |
| C | -2.536073 | -5.187444 | -3.618217 |
| C | -2.733520 | -3.857801 | -3.065301 |
| C | -3.898151 | -3.562358 | -2.351948 |
| C | -4.579365 | -2.293899 | -2.561513 |
| C | -6.003657 | -2.528558 | -2.500500 |
| C | -6.216834 | -3.943033 | -2.252435 |
| C | -4.913825 | -4.584551 | -2.160320 |

### Dimer 3<sup>+</sup>

|   |           |           |          |
|---|-----------|-----------|----------|
| C | 2.684101  | -1.523027 | 4.339012 |
| C | 3.084171  | -0.258496 | 3.735763 |
| C | 2.551389  | -0.193932 | 2.389057 |
| C | 1.796219  | -1.447575 | 2.174926 |
| C | 1.889253  | -2.253268 | 3.371660 |
| C | 2.359571  | -1.587136 | 5.695584 |
| C | 2.414948  | -0.383508 | 6.509623 |
| C | 2.805184  | 0.831241  | 5.934827 |
| C | 3.156551  | 0.894979  | 4.528038 |
| C | 2.667454  | 2.146547  | 3.998049 |
| C | 2.142520  | 2.187168  | 2.699113 |
| C | 2.136472  | 1.018410  | 1.845923 |
| C | 0.964639  | 1.111194  | 0.882894 |
| C | 0.174255  | -0.228855 | 0.728838 |
| C | 0.608193  | -1.420444 | 1.479863 |
| C | -0.535228 | -2.179688 | 1.891884 |
| C | -0.441036 | -2.994445 | 3.038489 |
| C | 0.792242  | -3.021996 | 3.793265 |
| C | 0.452206  | -3.082747 | 5.201808 |
| C | 1.219434  | -2.377320 | 6.135228 |
| C | 0.567775  | -1.653481 | 7.209685 |
| C | 1.306003  | -0.422752 | 7.439848 |
| C | 0.621954  | 0.757846  | 7.770077 |
| C | 1.027563  | 2.019143  | 7.178812 |
| C | 2.097502  | 2.056807  | 6.277937 |
| C | 2.008519  | 2.865519  | 5.078705 |
| C | 0.853952  | 3.619055  | 4.828232 |
| C | 0.308168  | 3.664078  | 3.491895 |
| C | 0.932543  | 2.956744  | 2.448931 |
| C | 0.153743  | 2.250886  | 1.480434 |
| C | -1.237182 | 2.207698  | 1.604276 |
| C | -2.000781 | 1.014643  | 1.352577 |
| C | -1.401928 | -0.213457 | 0.751676 |
| C | -1.741257 | -1.457040 | 1.571105 |
| C | -2.782988 | -1.478711 | 2.491500 |
| C | -2.690995 | -2.278576 | 3.698532 |

|   |           |           |           |
|---|-----------|-----------|-----------|
| C | -1.547174 | -3.040408 | 3.965468  |
| C | -0.999830 | -3.092345 | 5.310997  |
| C | -1.624602 | -2.387688 | 6.343624  |
| C | -0.829304 | -1.657279 | 7.310817  |
| C | -1.537048 | -0.431240 | 7.647813  |
| C | -0.823457 | 0.751072  | 7.876335  |
| C | -1.318515 | 2.013211  | 7.347428  |
| C | -0.173335 | 2.798368  | 6.916826  |
| C | -0.257852 | 3.587940  | 5.767881  |
| C | -1.493066 | 3.619914  | 5.002151  |
| C | -1.140631 | 3.664369  | 3.595517  |
| C | -1.898390 | 2.956537  | 2.663814  |
| C | -3.045646 | 2.185571  | 3.090301  |
| C | -3.092865 | 0.978904  | 2.271122  |
| C | -3.492135 | -0.241462 | 2.844634  |
| C | -3.839334 | -0.296348 | 4.243609  |
| C | -3.344916 | -1.554567 | 4.778604  |
| C | -2.823320 | -1.608084 | 6.071425  |
| C | -2.768406 | -0.401100 | 6.884346  |
| C | -3.246335 | 0.811431  | 6.372592  |
| C | -2.506048 | 2.045088  | 6.612536  |
| C | -2.595504 | 2.862510  | 5.417153  |
| C | -3.387313 | 2.135120  | 4.439186  |
| C | -3.786371 | 0.865915  | 5.033405  |
| C | 2.193161  | -1.949014 | -4.026674 |
| C | 2.827787  | -0.918157 | -3.235149 |
| C | 3.407499  | 0.055495  | -4.129999 |
| C | 3.127339  | -0.367744 | -5.491678 |
| C | 2.375463  | -1.613133 | -5.425648 |
| C | 0.983292  | -2.517675 | -3.596588 |
| C | 2.214524  | -0.480891 | -2.043430 |
| C | 2.226097  | 0.905768  | -1.647476 |
| C | 2.751640  | 1.836446  | -2.536474 |
| C | 3.351419  | 1.411964  | -3.787719 |
| C | 3.033526  | 2.401515  | -4.806506 |
| C | 2.769573  | 1.996539  | -6.115177 |
| C | 2.812385  | 0.584145  | -6.465186 |
| C | 1.746599  | 0.329026  | -7.414054 |
| C | 1.027678  | -0.871716 | -7.354929 |
| C | 1.346286  | -1.858309 | -6.341078 |
| C | 0.096308  | -2.454206 | -5.893362 |
| C | -0.082489 | -2.772291 | -4.545487 |
| C | -1.352477 | -2.498872 | -3.886166 |
| C | 0.812680  | 3.350473  | -2.172662 |
| C | 2.045729  | 3.097629  | -2.800292 |
| C | 2.226787  | 3.441756  | -4.189219 |
| C | 1.178313  | 4.033958  | -4.915638 |
| C | 0.904581  | 3.615587  | -6.271125 |
| C | 1.681322  | 2.611524  | -6.862066 |
| C | 1.049638  | 1.581881  | -7.662562 |
| C | -0.337933 | 1.588601  | -7.846152 |
| C | -1.084239 | 0.348146  | -7.783225 |
| C | -0.414355 | -0.861021 | -7.538911 |
| C | -0.989395 | -1.841520 | -6.641720 |
| C | -2.213084 | -1.583843 | -6.012968 |
| C | -2.403645 | -1.927551 | -4.615945 |
| C | -3.207628 | -0.894986 | -4.004141 |
| C | -2.930296 | -0.493906 | -2.690172 |
| C | -2.959277 | 0.924248  | -2.362574 |
| C | -1.509054 | 3.361008  | -2.492716 |
| C | -0.271505 | 3.971923  | -2.926016 |
| C | -0.095400 | 4.311372  | -4.264950 |
| C | -1.157604 | 4.058725  | -5.224474 |
| C | -0.541119 | 3.626591  | -6.464968 |
| C | -1.147818 | 2.631884  | -7.235235 |
| C | -2.396539 | 2.029870  | -6.796606 |
| C | -2.354837 | 0.615403  | -7.136277 |
| C | -2.909645 | -0.330457 | -6.267386 |
| C | -3.518727 | 0.096416  | -5.023553 |
| C | -3.562650 | 1.458833  | -4.698001 |
| C | -3.277342 | 1.877727  | -3.346034 |
| C | -2.535430 | 3.125045  | -3.406050 |
| C | -2.360899 | 3.480032  | -4.801729 |
| C | -2.993359 | 2.445865  | -5.604467 |
| C | -1.344547 | -0.133019 | -0.902067 |
| C | 0.214842  | -0.151103 | -0.796820 |
| C | 1.012271  | 1.208614  | -0.771117 |
| C | 0.249086  | 2.383667  | -1.286315 |
| C | -1.922795 | 1.177761  | -1.411871 |
| C | -1.174246 | 2.354231  | -1.495471 |
| C | -1.090692 | -2.081673 | -2.522923 |
| C | -1.898594 | -1.133294 | -1.902645 |
| C | 0.378713  | -2.088326 | -2.355361 |
| C | 0.988409  | -1.093590 | -1.624731 |

### Dimer 4<sup>+</sup>

|   |          |           |          |
|---|----------|-----------|----------|
| C | 2.698010 | -1.530367 | 4.493841 |
| C | 3.097423 | -0.346146 | 3.752747 |
| C | 2.546081 | -0.438133 | 2.421339 |
| C | 1.792156 | -1.697868 | 2.334207 |

C 1.892154 -2.359484 3.613729  
C 2.374107 -1.429415 5.847701  
C 2.435465 -0.136974 6.511803  
C 2.829620 1.002767 5.800276  
C 3.163518 0.897664 4.394405  
C 2.671493 2.086408 3.721412  
C 2.121686 1.985627 2.425374  
C 2.094928 0.708013 1.774275  
C 0.978180 0.658383 0.810911  
C 0.183148 -0.669337 0.718547  
C 0.610745 -1.771162 1.602801  
C -0.538721 -2.456876 2.118599  
C -0.444999 -3.117210 3.362566  
C 0.791698 -3.062753 4.121286  
C 0.456461 -2.960461 5.526737  
C 1.227682 -2.154083 6.372884  
C 0.582484 -1.307989 7.360270  
C 1.326664 -0.065047 7.445652  
C 0.646192 1.146429 7.629491  
C 1.051879 2.326457 6.884496  
C 2.123895 2.261554 5.993316  
C 2.033110 2.921672 4.701819  
C 0.867588 3.621554 4.344875  
C 0.334750 3.533132 3.001949  
C 0.968437 2.765071 2.023939  
C 0.192827 2.014311 0.936300  
C -1.217097 1.834345 1.374992  
C -1.923642 0.653580 1.294470  
C -1.387800 -0.624696 0.754581  
C -1.745839 -1.767236 1.711075  
C -2.779827 -1.667718 2.643481  
C -2.686221 -2.312769 3.935335  
C -1.540565 -3.045697 4.289901  
C -0.995609 -2.947581 5.634133  
C -1.614372 -2.125953 6.577092  
C -0.815454 -1.293978 7.460955  
C -1.515569 -0.040468 7.653941  
C -0.798823 1.156644 7.736540  
C -1.291684 2.348081 7.057068  
C -0.149676 3.068235 6.528098  
C -0.237393 3.706099 5.286086  
C -1.478029 3.664454 4.534279  
C -1.135664 3.554175 3.130998  
C -1.885350 2.720641 2.320271  
C -3.045574 2.023755 2.832529  
C -3.076493 0.731035 2.183471  
C -3.502609 -0.398809 2.858456  
C -3.847221 -0.291200 4.261644  
C -3.341321 -1.476663 4.928847  
C -2.814170 -1.380973 6.221079  
C -2.754650 -0.095162 6.888450  
C -3.234776 1.051501 6.245122  
C -2.487733 2.299572 6.331194  
C -2.587427 2.972388 5.051649  
C -3.395358 2.140678 4.177831  
C -3.795838 0.954099 4.912437  
C 2.175509 -1.978792 -4.296115  
C 2.813448 -1.054271 -3.389550  
C 3.380057 0.030133 -4.156244  
C 3.108440 -0.228957 -5.558631  
C 2.360760 -1.476178 -5.645472  
C 0.965710 -2.597381 -3.927129  
C 2.195774 -0.769745 -2.161707  
C 2.186620 0.569969 -1.640196  
C 2.730201 1.615329 -2.366553  
C 3.328159 1.343717 -3.652956  
C 3.002828 2.443523 -4.537947  
C 2.746314 2.196431 -5.890133  
C 2.792707 0.833908 -6.407623  
C 1.730888 0.691840 -7.386742  
C 1.012162 -0.507449 -7.470271  
C 1.329349 -1.606984 -6.577746  
C 0.078171 -2.253678 -6.200068  
C -0.100601 -2.732725 -4.898409  
C -1.368010 -2.545350 -4.209623  
C 0.824268 3.133081 -1.751100  
C 2.017347 2.908483 -2.441994  
C 2.195903 3.399555 -3.795904  
C 1.164351 4.084372 -4.453183  
C 0.888960 3.820044 -5.852357  
C 1.663983 2.891419 -6.558691  
C 1.034526 1.962998 -7.482780  
C -0.351754 1.989258 -7.663933  
C -1.096389 0.746937 -7.750177  
C -0.428821 -0.477761 -7.652695  
C -1.003469 -1.557789 -6.868279  
C -2.229685 -1.382042 -6.214343  
C -2.417625 -1.890630 -4.868948  
C -3.221126 -0.938059 -4.137372  
C -2.936597 -0.697503 -2.785206  
C -2.938728 0.674773 -2.314162  
C -1.493567 3.085510 -2.146331  
C -0.257660 3.770987 -2.473980  
C -0.097800 4.271442 -3.774586  
C -1.163679 4.124181 -4.758039  
C -0.553350 3.847497 -6.041919  
C -1.161317 2.948751 -6.929111  
C -2.409698 2.299022 -6.569788  
C -2.367356 0.935922 -7.068885  
C -2.924160 -0.107931 -6.316840  
C -3.535112 0.168122 -5.033257

C -3.572190 1.482080 -4.552914  
C -3.278587 1.739595 -3.155190  
C -2.538622 2.973916 -3.069359  
C -2.365358 3.494544 -4.412833  
C -3.004677 2.569329 -5.333772  
C -1.341039 -0.539890 -0.954582  
C 0.212611 -0.588963 -0.846210  
C 1.018057 0.754787 -0.753344  
C 0.246394 2.108492 -0.770012  
C -1.874520 0.814022 -1.368224  
C -1.170801 1.988646 -1.286445  
C -1.104081 -2.298419 -2.804282  
C -1.908018 -1.424929 -2.068710  
C 0.365278 -2.330431 -2.640670  
C 0.982252 -1.439665 -1.779824

### Dimer HPR-C<sub>s</sub><sup>+</sup>

C 2.628146 -1.588295 4.777243  
C 3.131193 -0.456170 4.018442  
C 2.724043 -0.613385 2.638712  
C 1.949090 -1.871470 2.543159  
C 1.899621 -2.454713 3.866626  
C 2.181293 -1.412541 6.089612  
C 2.209211 -0.089196 6.694259  
C 2.697870 1.001415 5.967890  
C 3.172135 0.815241 4.609157  
C 2.775312 1.969792 3.835943  
C 2.351319 1.800943 2.504422  
C 2.378019 0.498272 1.884058  
C 0.854664 -1.973700 1.696443  
C -0.358244 -2.595715 2.170422  
C -0.407156 -3.193490 3.443742  
C 0.747045 -3.119630 4.310059  
C 0.275323 -2.929060 5.669135  
C 0.975648 -2.090410 6.542121  
C 0.255126 -1.181301 7.414762  
C 1.015998 0.053093 7.508523  
C 0.349249 1.284635 7.564667  
C 0.852960 2.416693 6.808652  
C 2.004394 2.282213 6.026314  
C 2.056909 2.875728 4.702951  
C 0.949090 3.574691 4.201882  
C 0.542239 3.417058 2.822188  
C 1.253079 2.575527 1.978672  
C -1.508046 -1.904686 1.638408  
C -2.634711 -1.737303 2.430688  
C -2.684875 -2.320712 3.754141  
C -1.596104 -3.050894 4.252640  
C -1.181613 -2.886425 5.633378  
C -1.873953 -2.007097 6.472121  
C -1.145417 -1.140259 7.380413  
C -1.836715 0.136388 7.438864  
C -1.102883 1.327163 7.529085  
C -1.501460 2.485677 6.750690  
C -0.291699 3.155772 6.297523  
C -0.243833 3.717257 5.018797  
C -1.401454 3.643912 4.144359  
C -0.937518 3.460599 2.785819  
C -1.654191 2.660668 1.907325  
C -2.820021 1.952060 2.377399  
C -2.891947 0.652125 1.755026  
C -3.339110 -0.436335 2.489991  
C -3.803558 -0.253491 3.848201  
C -3.405833 -1.412132 4.629082  
C -3.014090 -1.260578 5.961944  
C -2.994413 0.062948 6.566434  
C -3.382123 1.179211 5.818478  
C -2.618948 2.417768 5.912613  
C -2.571372 3.011240 4.589236  
C -3.297898 2.147350 3.686830  
C -3.799193 1.019067 4.437949  
C 2.144854 -1.958613 -4.604914  
C 2.871140 -1.094410 -3.702575  
C 3.372234 0.033822 -4.453862  
C 2.955295 -0.126751 -5.834410  
C 2.192544 -1.365504 -5.928420  
C 0.975015 -2.591495 -4.160098  
C 2.392950 -0.898972 -2.393336  
C 2.464622 0.401115 -1.771205  
C 2.911686 1.489539 -2.506224  
C 3.376215 1.306531 -3.864454  
C 2.978297 2.464828 -4.645703  
C 2.586811 2.313004 -5.978565  
C 2.567442 0.989274 -6.582690  
C 1.409901 0.915326 -7.455307  
C 0.676413 -0.275647 -7.545399  
C 1.075074 -1.433855 -6.766557  
C -0.134519 -2.104364 -6.313596  
C -0.182530 -2.665484 -5.034703  
C -1.375453 -2.522868 -4.218068  
C 1.079924 2.957582 -1.655475  
C 2.206707 2.790190 -2.447548  
C 2.256823 3.373424 -3.770991  
C 1.167997 4.103256 -4.269927  
C 0.753692 3.938383 -5.650717  
C 1.446388 3.059024 -6.489093  
C 0.718231 2.191832 -7.397327  
C -0.682317 2.232436 -7.431981

C -1.442807 0.997823 -7.525599  
C -0.775756 -0.233546 -7.581304  
C -1.279252 -1.365504 -6.824982  
C -2.430856 -1.231172 -6.042868  
C -2.483458 -1.824264 -4.719412  
C -3.202137 -0.918242 -3.852722  
C -2.778449 -0.748882 -2.521152  
C -2.805496 0.553893 -1.901080  
C -1.282771 3.026357 -1.713754  
C -0.069896 3.648271 -2.187745  
C -0.021118 4.245719 -3.461277  
C -1.175061 4.171329 -4.327811  
C -0.703222 3.980717 -5.686844  
C -1.403185 3.141596 -6.559730  
C -2.608589 2.463516 -6.107178  
C -2.636105 1.140029 -6.711485  
C -3.124641 0.049498 -5.984885  
C -3.599281 0.235982 -4.626256  
C -3.558684 1.507461 -4.035848  
C -3.151637 1.665247 -2.656138  
C -2.376948 2.923490 -2.560794  
C -2.327602 3.506456 -3.884438  
C -3.055685 2.639593 -4.794959  
C -0.969012 -2.364770 -2.838307  
C -1.680149 -1.523110 -1.995115  
C 0.510774 -2.407997 -2.801656  
C 1.227056 -1.607598 -1.923279  
C 1.333260 0.427969 0.822107  
C 0.516591 -0.896709 0.721844  
C 0.582136 1.814731 0.885193  
C -0.976172 1.860428 0.846936  
C -1.802439 0.519627 0.745264  
C -1.060486 -0.850613 0.683092  
C -1.009413 -0.761998 -0.901809  
C 0.548632 -0.807185 -0.863504  
C 1.374788 0.533758 -0.761942  
C 0.632717 1.903720 -0.699627  
C -1.760995 0.624738 -0.838860  
C -0.944858 1.949667 -0.738498

**Dimer HPR-D<sub>2h</sub><sup>+</sup>**

C -4.837045 4.573415 -10.929337  
C -6.118119 4.531753 -10.245522  
C -6.266060 3.212513 -9.651639  
C -5.076576 2.439525 -9.972561  
C -4.194327 3.283362 -10.760685  
C -4.071273 5.745267 -10.906082  
C -4.560457 6.915868 -10.197843  
C -5.799256 6.881179 -9.549438  
C -6.596108 5.661762 -9.573969  
C -7.227493 5.519015 -8.277071  
C -7.355869 4.248100 -7.693062  
C -6.868291 3.076267 -8.399384  
C -6.314920 2.157542 -7.420198  
C -5.176273 1.399506 -7.739036  
C -4.546459 1.545691 -9.036551  
C -3.104479 1.469693 -8.842810  
C -2.257190 2.291368 -9.593278  
C -2.808691 3.210139 -10.574762  
C -2.015166 4.424763 -10.550609  
C -2.635088 5.669481 -10.713401  
C -2.231625 6.793098 -9.884911  
C -3.422936 7.563407 -9.564427  
C -3.563135 8.134399 -8.297977  
C -4.844420 8.090871 -7.615912  
C -5.946029 7.480182 -8.237372  
C -6.827659 6.640807 -7.459212  
C -6.565586 6.442115 -6.091446  
C -6.757715 5.145480 -5.488073  
C -7.115699 4.062045 -6.280577  
C -6.460598 2.746792 -6.109044  
C -5.470936 2.563559 -5.151958  
C -4.271284 1.837025 -5.490629  
C -4.133479 1.231830 -6.752877  
C -2.857036 1.277456 -7.427530  
C -1.770073 1.918052 -6.810058  
C -0.886483 2.761188 -7.595968  
C -1.120603 2.941554 -8.960580  
C -0.970066 4.260878 -9.554368  
C -0.572207 5.344682 -8.765043  
C -1.217388 6.639875 -8.934224  
C -1.360204 7.238751 -7.621821  
C -2.517391 7.968398 -7.303496  
C -3.139474 7.828694 -6.006933  
C -4.603658 7.905936 -6.203420  
C -5.466723 7.121247 -5.448778  
C -4.984571 6.310589 -4.295450  
C -5.842797 4.996809 -4.322187  
C -5.151983 3.610921 -4.142012  
C -3.598495 3.528861 -3.933885  
C -3.134972 2.440398 -4.838332  
C -1.914615 2.507113 -5.498617  
C -1.105593 3.745389 -5.473613  
C -0.484090 3.886075 -6.770104  
  
C -0.322766 5.155405 -7.349640  
C -0.806290 6.323776 -6.650689

C -1.438459 6.171832 -5.403328  
C -2.591830 6.969443 -5.062874  
C -3.441365 6.228989 -4.088998  
C -2.746313 4.833494 -3.907024  
C -1.546772 4.871029 -4.789366  
C -3.804966 3.631392 -2.353898  
C -5.358332 3.713128 -2.562333  
C -5.942435 2.796818 -1.543311  
C -4.881757 2.139388 -0.819474  
C -3.606540 2.674400 -1.230510  
C -2.952408 4.936144 -2.327560  
C -3.647424 6.331672 -2.508214  
C -5.190626 6.412891 -2.714839  
C -6.048826 5.099179 -2.741620  
C -7.228481 5.379513 -1.876171  
C -7.795830 4.399398 -1.071344  
C -7.140812 3.083782 -0.901655  
C -7.344619 2.668506 0.467006  
C -6.337955 1.976026 1.159939  
C -5.081176 1.701726 0.502370  
C -4.018206 1.853698 1.469204  
C -2.799335 2.429219 1.073466  
C -2.594292 2.844436 -0.294769  
C -1.785108 4.082897 -0.269317  
C -2.017363 5.105308 -1.180595  
C -2.048452 6.475254 -0.729501  
C -3.062819 7.203919 -1.451888  
C -3.819504 8.166883 -0.796228  
C -5.283817 8.244137 -0.991725  
C -5.937687 7.355166 -1.835533  
C -7.175199 6.744886 -1.413674  
C -7.775329 7.111604 -0.195384  
C -8.389889 6.096135 0.628294  
C -8.386112 4.759375 0.197367  
C -8.115182 3.694462 1.147343  
C -7.850679 3.998717 2.484096  
C -6.795538 3.292781 3.193719  
C -6.058200 2.296485 2.545717  
C -4.616066 2.220384 2.738032  
C -3.975375 3.144597 3.569583  
C -2.704424 3.728275 3.170441  
C -2.132122 3.379775 1.945520  
C -1.513454 4.397467 1.114280  
C -1.483884 5.732589 1.549543  
C -1.753004 6.795054 0.608062  
C -2.522107 7.816274 1.280970  
C -3.547237 8.480483 0.587537  
C -4.809035 8.754175 1.252476  
C -5.874790 8.603243 0.277068  
C -7.108313 8.057535 0.669146  
C -7.311751 7.632619 2.039849  
C -8.108770 6.413008 2.014636  
C -7.837470 5.385117 2.923379  
C -6.772817 5.534593 3.900918  
C -6.130011 4.244551 4.067265  
C -4.744190 4.171411 4.251992  
C -3.950543 5.386005 4.277078  
C -2.688618 5.114205 3.610195  
C -2.083921 6.095813 2.818214  
C -2.729259 7.391403 2.651215  
C -3.950247 7.647267 3.283963  
C -5.006703 8.350922 2.574607  
C -6.279212 7.769808 2.973087  
C -6.007060 6.706569 3.925159  
C -4.570766 6.630722 4.116612

**C<sub>120</sub>-NT-D<sub>5d</sub><sup>+</sup>**

C 12.945054 12.664911 19.067770  
C 13.623131 12.396881 17.863340  
C 12.930910 12.642120 16.626456  
C 13.624409 12.432636 15.391682  
C 12.938899 12.631955 14.164314  
C 13.625599 12.401045 12.929561  
C 12.908394 12.565797 11.693399  
C 13.614313 12.392803 10.487720  
C 13.157332 12.964673 9.245608  
C 14.314981 13.351099 8.462043  
C 14.290850 14.531052 7.707673  
C 15.450295 15.408628 7.699747  
C 14.974440 16.782839 7.689974  
C 15.653340 17.760457 8.428084  
C 14.909228 18.736631 9.200559  
C 15.611971 18.975999 10.436210  
C 14.934031 19.244250 11.640663  
C 15.626436 18.999300 12.877555  
C 14.932987 19.208920 14.112422  
C 15.618378 19.009074 15.339788  
C 14.931826 19.240216 16.574610  
C 15.648986 19.075007 17.810761  
C 14.943059 19.247895 19.016443  
C 15.399924 18.675873 20.258537  
C 14.242214 18.289468 21.041984  
C 14.266229 17.109528 21.796328  
C 13.106671 16.232063 21.804371  
C 13.582438 14.857838 21.814092  
C 12.903510 13.880223 21.076029  
C 13.647560 12.903933 20.303590  
C 11.760295 13.492436 19.063095

|   |           |           |           |
|---|-----------|-----------|-----------|
| C | 11.734223 | 14.238333 | 20.296481 |
| C | 11.278279 | 15.556004 | 20.287126 |
| C | 11.971812 | 16.570727 | 21.057172 |
| C | 11.956179 | 17.788670 | 20.269868 |
| C | 13.067628 | 18.630623 | 20.262602 |
| C | 13.498008 | 19.219477 | 19.018863 |
| C | 12.795422 | 19.018714 | 17.815617 |
| C | 13.501275 | 19.211913 | 16.577069 |
| C | 12.820110 | 18.953432 | 15.344768 |
| C | 13.492661 | 19.180201 | 14.115005 |
| C | 12.803574 | 18.942623 | 12.882868 |
| C | 13.480784 | 19.215053 | 11.643456 |
| C | 12.808898 | 18.920913 | 10.441659 |
| C | 13.515312 | 18.709543 | 9.203154  |
| C | 12.806719 | 17.705227 | 8.433192  |
| C | 13.520344 | 16.754597 | 7.692675  |
| C | 13.098266 | 15.363097 | 7.704033  |
| C | 11.980047 | 14.980594 | 8.455176  |
| C | 12.013982 | 13.762733 | 9.242223  |
| C | 11.316287 | 13.998918 | 10.481182 |
| C | 11.717365 | 13.398941 | 11.689801 |
| C | 11.312235 | 14.020605 | 12.922047 |
| C | 11.758796 | 13.458267 | 14.160311 |
| C | 11.331261 | 14.038772 | 15.383358 |
| C | 11.758597 | 13.462638 | 16.622105 |
| C | 11.283603 | 14.033220 | 17.854161 |
| C | 10.809637 | 15.407006 | 17.844339 |
| C | 10.844375 | 16.142496 | 19.043952 |
| C | 11.264126 | 17.525218 | 19.033257 |
| C | 11.637987 | 18.139677 | 17.823226 |
| C | 11.253117 | 17.502379 | 16.592607 |
| C | 11.673458 | 18.081333 | 15.352919 |
| C | 11.263991 | 17.484768 | 14.131545 |
| C | 11.664299 | 18.077005 | 12.891514 |
| C | 11.206870 | 17.488707 | 11.661159 |
| C | 11.657338 | 18.047924 | 10.450689 |
| C | 11.655253 | 17.301878 | 9.217149  |
| C | 11.250623 | 15.967534 | 9.227922  |
| C | 10.843901 | 15.364520 | 10.472452 |
| C | 10.785650 | 16.097813 | 11.672414 |
| C | 10.845869 | 15.373119 | 12.913176 |
| C | 10.846731 | 16.106095 | 14.142443 |
| C | 10.861894 | 15.400468 | 15.374021 |
| C | 10.838439 | 16.133146 | 16.603285 |
| C | 15.059376 | 12.421138 | 10.485196 |
| C | 15.489557 | 13.010079 | 9.241427  |
| C | 16.601070 | 13.851964 | 9.234042  |
| C | 16.585277 | 15.070029 | 8.446832  |
| C | 17.278658 | 16.084719 | 9.217016  |
| C | 16.822669 | 17.402443 | 9.207606  |
| C | 16.796425 | 18.148163 | 10.441082 |
| C | 17.272738 | 17.607173 | 11.650034 |
| C | 16.798379 | 18.178322 | 12.882085 |
| C | 17.225046 | 17.601596 | 14.120728 |
| C | 16.798137 | 18.182411 | 15.343760 |
| C | 17.244342 | 17.619575 | 16.581946 |
| C | 16.839742 | 18.241459 | 17.814245 |
| C | 17.240733 | 17.641399 | 19.022851 |
| C | 16.543126 | 17.877614 | 20.261895 |
| C | 16.576982 | 16.659858 | 21.049071 |
| C | 15.458797 | 16.277472 | 21.800257 |
| C | 15.036483 | 14.885964 | 21.811492 |
| C | 15.750113 | 13.935237 | 21.071019 |
| C | 15.041480 | 12.931041 | 20.301010 |
| C | 15.748060 | 12.719452 | 19.062592 |
| C | 15.076394 | 12.425567 | 17.860626 |
| C | 15.754209 | 12.697256 | 16.621263 |
| C | 15.064881 | 12.460987 | 15.389041 |
| C | 15.737830 | 12.686783 | 14.159272 |
| C | 15.056257 | 12.429244 | 12.926967 |
| C | 15.762159 | 12.621822 | 11.688411 |
| C | 16.919670 | 13.500674 | 11.680678 |
| C | 17.293224 | 14.115369 | 10.470650 |
| C | 17.712635 | 15.498134 | 10.460121 |
| C | 17.747037 | 16.233407 | 11.659901 |
| C | 17.718851 | 15.507082 | 12.900847 |
| C | 17.694372 | 16.239615 | 14.130113 |
| C | 17.710340 | 15.533951 | 15.361628 |
| C | 17.710778 | 16.267032 | 16.590875 |
| C | 17.771221 | 15.542446 | 17.831653 |
| C | 17.713162 | 16.275785 | 19.031643 |
| C | 17.306286 | 15.672837 | 20.276174 |
| C | 16.901568 | 14.338489 | 20.287095 |
| C | 16.899598 | 13.592336 | 19.053595 |
| C | 17.350028 | 14.151548 | 17.843093 |
| C | 16.893474 | 13.562664 | 16.612665 |
| C | 17.293455 | 14.155197 | 15.372643 |
| C | 16.884577 | 13.558354 | 14.151077 |
| C | 17.304590 | 14.137743 | 12.911401 |
